# Supplementary material
Source: PubMed Central journal article supplement (PMC4945471)
Supplement: NIHMS782375-supplement-Supplemental_Figure_2.pdf [file NIHMS782375-supplement-Supplemental_Figure_2.pdf]

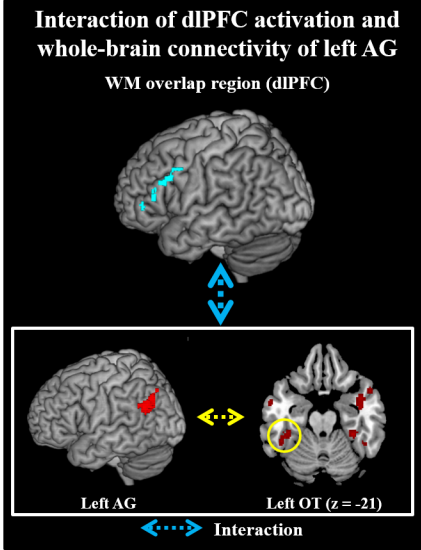

*Supplemental Figure 2.* During Passages > Symbols, one unit increase in dIPFC activation is associated with increased correlations between the left AG and left OT area. Additionally, AG-to-OT mediation by dIPFC was predicted by WM capacity (not shown). Results displayed at p-corrected < .05 (p-unc < .005, k = 118).
